# Supplementary material
Source: PubMed Central journal article supplement (PMC4392176)
Supplement: NIHMS672750-supplement-Supplementary_Tables.pdf [file NIHMS672750-supplement-Supplementary_Tables.pdf]

**Supplementary Table S1:** Association between energy expenditure and exercise duration (min/week).

|                 | Abs. TDEE<br>(kcal/day) |                 | Rel. TDEE<br>(kcal/kg/day) |                 | Abs. MVPA<br>(kcal/day) |                 | Rel. MVPA<br>(kcal/kg/day) |                 | MVPA time<br>(min/day) |                 | Light PA time<br>(min/day) |             | Sedentary time<br>(min/day) |             |
|-----------------|-------------------------|-----------------|----------------------------|-----------------|-------------------------|-----------------|----------------------------|-----------------|------------------------|-----------------|----------------------------|-------------|-----------------------------|-------------|
|                 | <i>r</i>                | <i>p</i>        | <i>r</i>                   | <i>p</i>        | <i>r</i>                | <i>p</i>        | <i>r</i>                   | <i>p</i>        | <i>r</i>               | <i>p</i>        | <i>r</i>                   | <i>p</i>    | <i>r</i>                    | <i>p</i>    |
| Sports          | .077                    | .115            | <b>.105</b>                | <b>.002</b>     | <b>.154</b>             | <b>.002</b>     | <b>.161</b>                | <b>.001</b>     | <b>.145</b>            | <b>.003</b>     | -.062                      | .208        | -.064                       | .195        |
| Aerobics/Grp.EX | .077                    | .118            | -.019                      | .702            | .024                    | .631            | -.005                      | .923            | -.012                  | .805            | .032                       | .513        | .002                        | .973        |
| Swimming        | <b>.162</b>             | <b>.001</b>     | <b>.111</b>                | <b>.023</b>     | <b>.144</b>             | <b>.003</b>     | <b>.125</b>                | <b>.011</b>     | .090                   | .066            | .011                       | .828        | <b>-.119</b>                | <b>.015</b> |
| Brisk Walking   | <b>.107</b>             | <b>.030</b>     | .012                       | .806            | .042                    | .393            | .017                       | .735            | .021                   | .673            | <b>.080</b>                | <b>.014</b> | <b>-.136</b>                | <b>.006</b> |
| Other PA        | <b>.115</b>             | <b>.019</b>     | .053                       | .278            | <b>.101</b>             | <b>.041</b>     | .064                       | .193            | .075                   | .128            | -.002                      | .962        | -.057                       | .243        |
| Resistance EX   | <b>.196</b>             | <b>&lt;.001</b> | .051                       | .299            | <b>.117</b>             | <b>.017</b>     | .059                       | .231            | .062                   | .207            | .013                       | .792        | -.065                       | .188        |
| Endurance EX    | <b>.149</b>             | <b>.002</b>     | <b>.241</b>                | <b>&lt;.001</b> | <b>.267</b>             | <b>&lt;.001</b> | <b>.262</b>                | <b>&lt;.001</b> | <b>.195</b>            | <b>&lt;.001</b> | -.059                      | .230        | <b>-.117</b>                | <b>.017</b> |
| Total Exercise  | <b>.256</b>             | <b>&lt;.001</b> | <b>.177</b>                | <b>&lt;.001</b> | <b>.251</b>             | <b>&lt;.001</b> | <b>.200</b>                | <b>&lt;.001</b> | <b>.171</b>            | <b>&lt;.001</b> | .000                       | .992        | <b>-.161</b>                | <b>.001</b> |
| Household PA    | .038                    | .442            | .006                       | .895            | -.022                   | .655            | -.029                      | .562            | -.021                  | .665            | .081                       | .112        | -.080                       | .105        |
| Active Travel   | -.052                   | .295            | .095                       | .052            | .070                    | .157            | .087                       | .077            | .086                   | .082            | -.061                      | .215        | -.009                       | .862        |

**Note:** Values are Pearson correlation (*r*) adjusted for sex and ethnicity with significance (*p*). Significant results are highlighted in bold. Abs, absolute; Rel, relative; EX, exercise; PA, physical activity.

**Supplementary Table S2:** Association between energy expenditure and exercise engagement (min/week), separately for non-overweight and overweight/obese.

|            | Non-overweight          |                 |                            |                 |                         |                 |                            |                 | Overweight/Obese        |                 |                            |                 |                         |                 |                            |                 |
|------------|-------------------------|-----------------|----------------------------|-----------------|-------------------------|-----------------|----------------------------|-----------------|-------------------------|-----------------|----------------------------|-----------------|-------------------------|-----------------|----------------------------|-----------------|
|            | Abs. TDEE<br>(kcal/day) |                 | Rel. TDEE<br>(kcal/kg/day) |                 | Abs. MVPA<br>(kcal/day) |                 | Rel. MVPA<br>(kcal/kg/day) |                 | Abs. TDEE<br>(kcal/day) |                 | Rel. TDEE<br>(kcal/kg/day) |                 | Abs. MVPA<br>(kcal/day) |                 | Rel. MVPA<br>(kcal/kg/day) |                 |
|            | <i>r</i>                | <i>p</i>        | <i>r</i>                   | <i>p</i>        |
| Sports     | .117                    | .083            | <b>.158</b>                | <b>.019</b>     | <b>.144</b>             | <b>.032</b>     | <b>.163</b>                | <b>.015</b>     | .069                    | .340            | .075                       | .306            | .096                    | .188            | .076                       | .294            |
| Swimming   | .061                    | .363            | .097                       | .150            | .063                    | .347            | .083                       | .218            | <b>.268</b>             | <b>&lt;.001</b> | <b>.160</b>                | <b>.027</b>     | <b>.242</b>             | <b>.001</b>     | <b>.211</b>                | <b>.003</b>     |
| Walking    | <b>.132</b>             | <b>.049</b>     | .037                       | .579            | .061                    | .366            | .027                       | .694            | .054                    | .456            | .078                       | .286            | .071                    | .327            | .077                       | .293            |
| Other PA   | .123                    | .068            | .026                       | .701            | .055                    | .414            | .020                       | .768            | .140                    | .054            | .061                       | .401            | <b>.148</b>             | <b>.041</b>     | .110                       | .130            |
| Resist. EX | .037                    | .581            | .045                       | .501            | .051                    | .448            | .043                       | .526            | <b>.296</b>             | <b>&lt;.001</b> | <b>.218</b>                | <b>.002</b>     | <b>.283</b>             | <b>&lt;.001</b> | <b>.233</b>                | <b>.001</b>     |
| End. EX    | <b>.250</b>             | <b>&lt;.001</b> | <b>.258</b>                | <b>&lt;.001</b> | <b>.272</b>             | <b>&lt;.001</b> | <b>.262</b>                | <b>&lt;.001</b> | .051                    | .482            | <b>.271</b>                | <b>&lt;.001</b> | <b>.258</b>             | <b>&lt;.001</b> | <b>.293</b>                | <b>&lt;.001</b> |
| Total EX   | <b>.239</b>             | <b>&lt;.001</b> | <b>.210</b>                | <b>.002</b>     | <b>.222</b>             | <b>.001</b>     | <b>.203</b>                | <b>.002</b>     | <b>.271</b>             | <b>&lt;.001</b> | <b>.249</b>                | <b>.001</b>     | <b>.327</b>             | <b>&lt;.001</b> | <b>.288</b>                | <b>&lt;.001</b> |

**Note:** Values are Pearson correlation (*r*) adjusted for sex and ethnicity with significance (*p*). Significant results are highlighted in bold. Abs, absolute; Rel, relative; Resist. EX, resistance exercise; End. EX, endurance exercise; Total EX, total exercise.

**Supplementary Table S3:** Association between energy expenditure and exercise engagement (min/week), separately for men and women. Values are Pearson correlation (*r*) adjusted for ethnicity with significance (*p*).

|            | Males                   |             |                            |             |                         |             |                            |             | Females                 |                 |                            |                 |                         |                 |                            |                 |
|------------|-------------------------|-------------|----------------------------|-------------|-------------------------|-------------|----------------------------|-------------|-------------------------|-----------------|----------------------------|-----------------|-------------------------|-----------------|----------------------------|-----------------|
|            | Abs. TDEE<br>(kcal/day) |             | Rel. TDEE<br>(kcal/kg/day) |             | Abs. MVPA<br>(kcal/day) |             | Rel. MVPA<br>(kcal/kg/day) |             | Abs. TDEE<br>(kcal/day) |                 | Rel. TDEE<br>(kcal/kg/day) |                 | Abs. MVPA<br>(kcal/day) |                 | Rel. MVPA<br>(kcal/kg/day) |                 |
|            | <i>r</i>                | <i>p</i>    | <i>r</i>                   | <i>p</i>    | <i>r</i>                | <i>p</i>    | <i>r</i>                   | <i>p</i>    | <i>r</i>                | <i>p</i>        | <i>r</i>                   | <i>p</i>        | <i>r</i>                | <i>p</i>        | <i>r</i>                   | <i>p</i>        |
| Sports     | .63                     | .373        | <b>.151</b>                | <b>.031</b> | .134                    | .057        | .135                       | .055        | .122                    | .077            | <b>.160</b>                | <b>.020</b>     | <b>.214</b>             | <b>.002</b>     | <b>.221</b>                | <b>.001</b>     |
| Swimming   | .097                    | .170        | .021                       | .762        | .075                    | .288        | .045                       | .520        | <b>.273</b>             | <b>&lt;.001</b> | <b>.220</b>                | <b>.001</b>     | <b>.282</b>             | <b>&lt;.001</b> | <b>.244</b>                | <b>&lt;.001</b> |
| Walking    | .084                    | .233        | .054                       | .445        | .053                    | .451        | .032                       | .647        | <b>.156</b>             | <b>.023</b>     | -.034                      | .623            | .042                    | .540            | -.004                      | .950            |
| Other PA   | <b>.140</b>             | <b>.046</b> | .066                       | .347        | .114                    | .106        | .074                       | .293        | .063                    | .360            | .035                       | .609            | .066                    | .336            | .046                       | .505            |
| Resist. EX | <b>.170</b>             | <b>.016</b> | .074                       | .294        | .117                    | .096        | .069                       | .325        | <b>.243</b>             | <b>&lt;.001</b> | .020                       | .774            | .106                    | .125            | .036                       | .598            |
| End. EX    | .071                    | .313        | <b>.215</b>                | <b>.002</b> | <b>.207</b>             | <b>.003</b> | <b>.216</b>                | <b>.002</b> | <b>.266</b>             | <b>&lt;.001</b> | <b>.274</b>                | <b>&lt;.001</b> | <b>.382</b>             | <b>&lt;.001</b> | <b>.327</b>                | <b>&lt;.001</b> |
| Total EX   | <b>.207</b>             | <b>.003</b> | <b>.188</b>                | <b>.007</b> | <b>.228</b>             | <b>.001</b> | <b>.184</b>                | <b>.008</b> | <b>.338</b>             | <b>&lt;.001</b> | <b>.167</b>                | <b>.015</b>     | <b>.300</b>             | <b>&lt;.001</b> | <b>.225</b>                | <b>.001</b>     |

**Note:** Values are Pearson correlation (*r*) adjusted for sex and ethnicity with significance (*p*). Significant results are highlighted in bold. Abs, absolute; Rel, relative; Resist. EX, resistance exercise; End. EX, endurance exercise; Total EX, total exercise.

**Supplementary Table S4:** Final model for the contribution of time spent (min/week) in various exercise types to variability in relative energy expenditure based on best linear subset modelling, separately for (a) non-overweight and (b) overweight/obese participants.\*

| <b>(a) Nonoverweight participants</b> |       |                    |       |         |      |         |    |
|---------------------------------------|-------|--------------------|-------|---------|------|---------|----|
| Dependent variable                    | $R^2$ | Endurance exercise |       | Sports  |      | Walking |    |
|                                       |       | $\beta$            | p     | $\beta$ | p    | $\beta$ | p  |
| TDEE (kcal/kg/day)                    | .214  | .239               | <.001 | .143    | .024 | na      | na |
| MVPA (kcal/kg/day)                    | .203  | .249               | <.001 | .148    | .021 | na      | na |

  

| <b>(b) Overweight/obese</b> |       |                    |      |                     |      |          |      |
|-----------------------------|-------|--------------------|------|---------------------|------|----------|------|
| Dependent variable          | $R^2$ | Endurance Exercise |      | Resistance Exercise |      | Swimming |      |
|                             |       | $\beta$            | p    | $\beta$             | p    | $\beta$  | p    |
| TDEE (kcal/kg/day)          | .302  | .193               | .003 | .136                | .037 | .092     | .145 |
| MVPA (kcal/kg/day)          | .252  | .218               | .001 | .149                | .027 | .147     | .023 |

**Note:** TDEE, total daily energy expenditure; MVPA, moderate-to-vigorous physical activity; na, not applicable.

\* Values reflect standardized regression coefficients ( $\beta$ ) and p-value for final model after entering time spent (min/week) in endurance exercise, resistance exercise, sports, swimming, walking and other PA, adjusting for sex and ethnicity.

**Supplementary Table S5:** Final model for the contribution of time spent (min/week) in various exercise types contributing to variability in in relative energy expenditure based on best linear subset modelling, separately for (a) male and (b) female participants.\*

| <b>(a) Male participants</b>   |       |                    |       |                     |     |         |      |          |      |
|--------------------------------|-------|--------------------|-------|---------------------|-----|---------|------|----------|------|
| Dependent variable             | $R^2$ | Endurance Exercise |       | Resistance Exercise |     | Sports  |      | Walking  |      |
|                                |       | $\beta$            | $p$   | $\beta$             | $p$ | $\beta$ | $p$  | $\beta$  | $p$  |
| TDEE (kcal/kg/day)             | .069  | .207               | .003  | na                  | na  | .137    | .046 | na       | na   |
| MVPA (kcal/kg/day)             | .070  | .219               | .002  | na                  | na  | .118    | .086 | na       | na   |
| <b>(b) Female participants</b> |       |                    |       |                     |     |         |      |          |      |
| Dependent variable             | $R^2$ | Endurance Exercise |       | Resistance Exercise |     | Sports  |      | Swimming |      |
|                                |       | $\beta$            | $p$   | $\beta$             | $p$ | $\beta$ | $p$  | $\beta$  | $p$  |
| TDEE (kcal/kg/day)             | .091  | .224               | .002  | na                  | na  | na      | na   | .128     | .081 |
| MVPA (kcal/kg/day)             | .153  | .253               | <.001 | na                  | na  | .175    | .007 | .121     | .089 |

**Note:** TDEE, total daily energy expenditure; MVPA, moderate-to-vigorous physical activity; na, not applicable.

\* Values reflect standardized regression coefficients ( $\beta$ ) and p-value for final model after entering time spent (min/week) in endurance exercise, resistance exercise, sports, swimming, walking and other PA, adjusting for sex and ethnicity.
